# Supplementary material
Source: publisher figshare collection journal article supplement (https://acs.figshare.com/ndownloader/files/3780448)
Supplement: Supplementary file 1 [file 3780448]

## Supporting Information

# **Colossal Room-Temperature Electrocaloric Effect in Ferroelectric Polymer Nanocomposites Using Nanostructured Barium Strontium Titanates**

Guangzu Zhang,<sup>†,§,#</sup> Xiaoshan Zhang,<sup>†,‡,#</sup> Tiannan Yang<sup>†</sup>, Qi Li,<sup>†</sup> Long-Qing Chen,<sup>†</sup>  
Shenglin Jiang,<sup>§</sup> and Qing Wang<sup>†</sup>

<sup>†</sup>*Department of Materials Science and Engineering, The Pennsylvania State  
University, University Park, Pennsylvania 16802* <sup>§</sup>*School of Optical and Electronic  
Information, Huazhong University of Science and Technology, Wuhan, Hubei 430074  
China* <sup>‡</sup>*College of Materials Science and Engineering, Sichuan University, Chengdu  
610064 China*

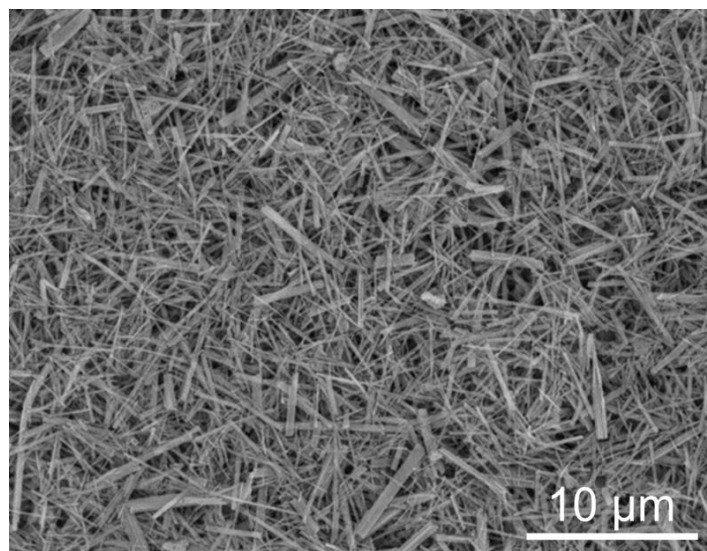

**Figure S1.** SEM image of the sodium titanate NW templates.

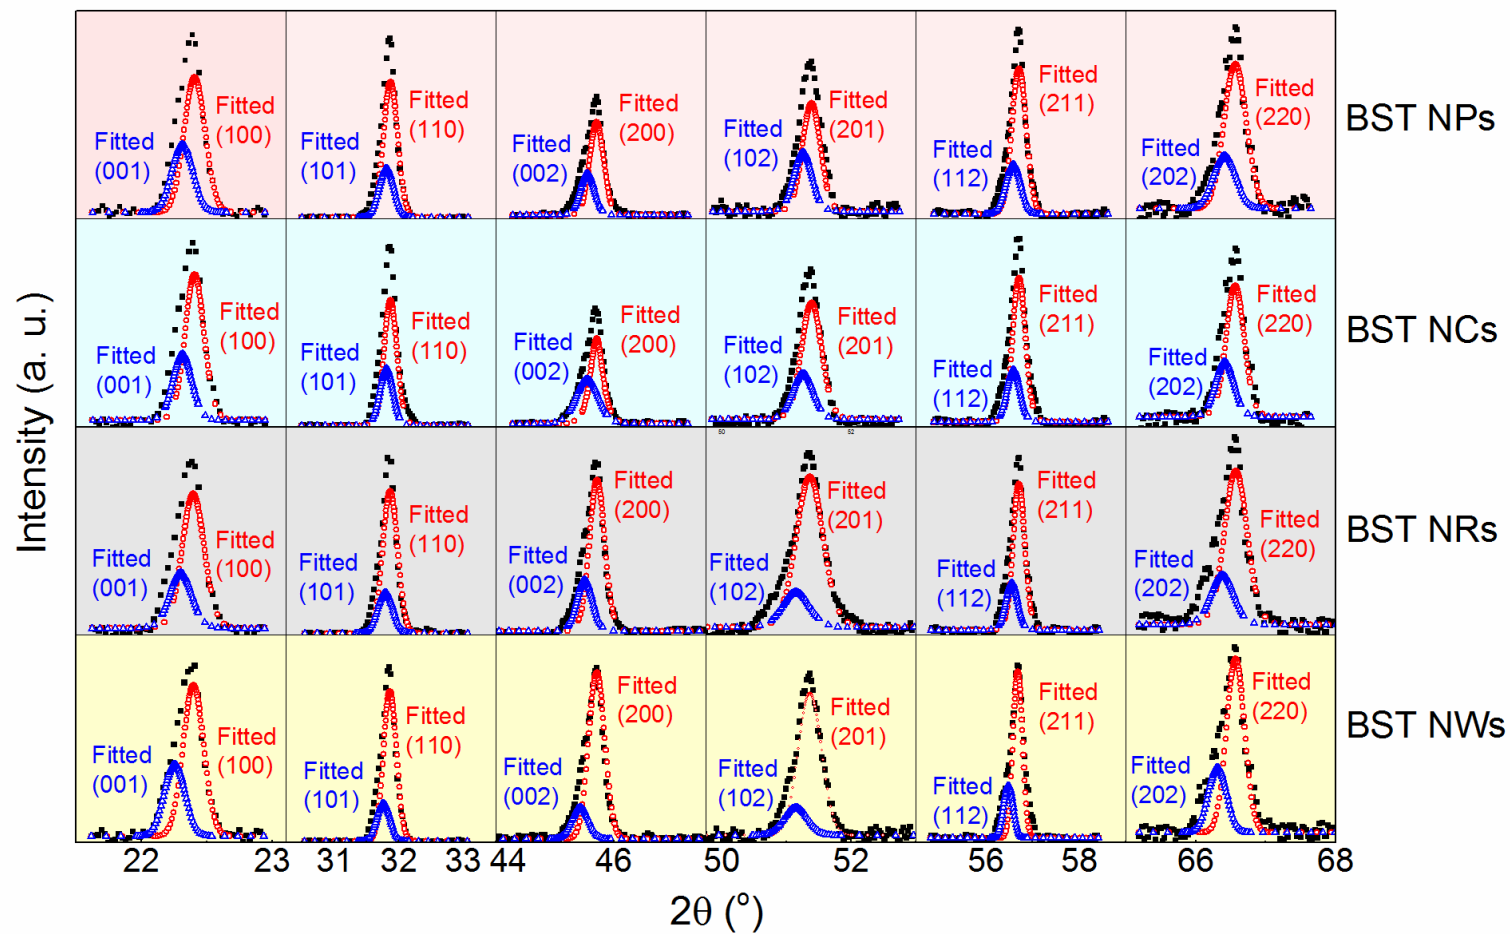

**Figure S2.** Detailed diffraction profiles of the XRD patterns of the BST nanoparticles (NPs), nanocubes (NCs), nanorods (NRs) and nanowires (NWs). The fitted peaks are obtained by the best fit to a mixed Gaussian-Lorentzian distribution.<sup>1</sup>

**Table S1.** Position of the characteristic peaks in the XRD patterns of the BST NPs, NCs, NRs and NWs obtained from Figure S2, and the lattice constants calculated from each peak by the Bragg equation  $\lambda=2d\sin\theta$ , in which  $\lambda$  is the X-ray wavelength ( $\lambda=1.54$  Å in this work),  $d$  is the interplanar spacing,  $h$ ,  $k$  and  $l$  are the Miller indices. For tetragonal BST,  $d=1/(\sqrt{\frac{h^2+k^2}{a^2} + \frac{l^2}{c^2}})$ . For powders, accurate lattice constants cannot be obtained by just using Bragg equation, because of (i) the absorption of the x-ray beam in the specimen, and (ii) the displacement of the rotation axis of the specimen relative to the geometric center of the cylindrical film, usually called the eccentricity error. In this work, the relatively accurate lattice constants are derived by using an extrapolation method.<sup>2</sup> After calculating the lattice constants from each XRD characteristic peak by the Bragg equation, and plotting the lattice constants as a function of  $1/2(\cos^2\theta/\theta + \cos^2\theta/\sin\theta)$ , the relatively accurate lattice constants of the powders can be extrapolated at the intersection points of the ordinate axis and the linearly fitted line of the Bragg-equation calculated lattice constants. Figure S3 plots the calculated lattice constants of the BST powders as a function of  $1/2(\cos^2\theta/\theta + \cos^2\theta/\sin\theta)$ . By linearly fitting the data, the extrapolated lattice parameters are obtained at the intersection point of the fitted line and the ordinate axis (as listed in Table S2).<sup>2</sup>

| (hkl) | BST NPs           |             |             | BST NCs           |             |             | BST NRs           |             |             | BST NWs           |             |             |
|-------|-------------------|-------------|-------------|-------------------|-------------|-------------|-------------------|-------------|-------------|-------------------|-------------|-------------|
|       | 2 $\theta$<br>(°) | $a$<br>(nm) | $c$<br>(nm) |
| (001) | 22.31185          | 0.39646     | 0.39812     | 22.31167          | 0.39646     | 0.39812     | 22.29855          | 0.39664     | 0.39835     | 22.25255          | 0.39661     | 0.39917     |
| (100) | 22.40656          |             |             | 22.40648          |             |             | 22.39606          |             |             | 22.39806          |             |             |
| (101) | 31.80611          | 0.39672     | 0.39839     | 31.80611          | 0.39674     | 0.39837     | 31.78852          | 0.39680     | 0.39874     | 31.75852          | 0.39684     | 0.39944     |
| (110) | 31.87480          |             |             | 31.87322          |             |             | 31.86805          |             |             | 31.86490          |             |             |
| (002) | 45.49455          | 0.39691     | 0.39842     | 45.49055          | 0.39691     | 0.39845     | 45.44152          | 0.39685     | 0.39886     | 45.35855          | 0.39690     | 0.39955     |
| (200) | 45.67721          |             |             | 45.67711          |             |             | 45.68496          |             |             | 45.67806          |             |             |
| (102) | 51.25211          | 0.39693     | 0.39858     | 51.25352          | 0.39692     | 0.39857     | 51.21991          | 0.39688     | 0.39888     | 51.14243          | 0.39692     | 0.39958     |
| (201) | 51.38912          |             |             | 51.39011          |             |             | 51.38648          |             |             | 51.36219          |             |             |
| (112) | 56.58400          | 0.39696     | 0.39865     | 56.58855          | 0.39698     | 0.39860     | 56.55318          | 0.39692     | 0.39897     | 56.47990          | 0.39696     | 0.39967     |
| (211) | 56.71560          |             |             | 56.71460          |             |             | 56.71243          |             |             | 56.68918          |             |             |
| (202) | 66.41082          | 0.39701     | 0.39866     | 66.41082          | 0.39702     | 0.39864     | 66.37717          | 0.39697     | 0.39906     | 66.30817          | 0.39699     | 0.39978     |
| (220) | 66.56613          |             |             | 66.56403          |             |             | 66.57401          |             |             | 66.57002          |             |             |

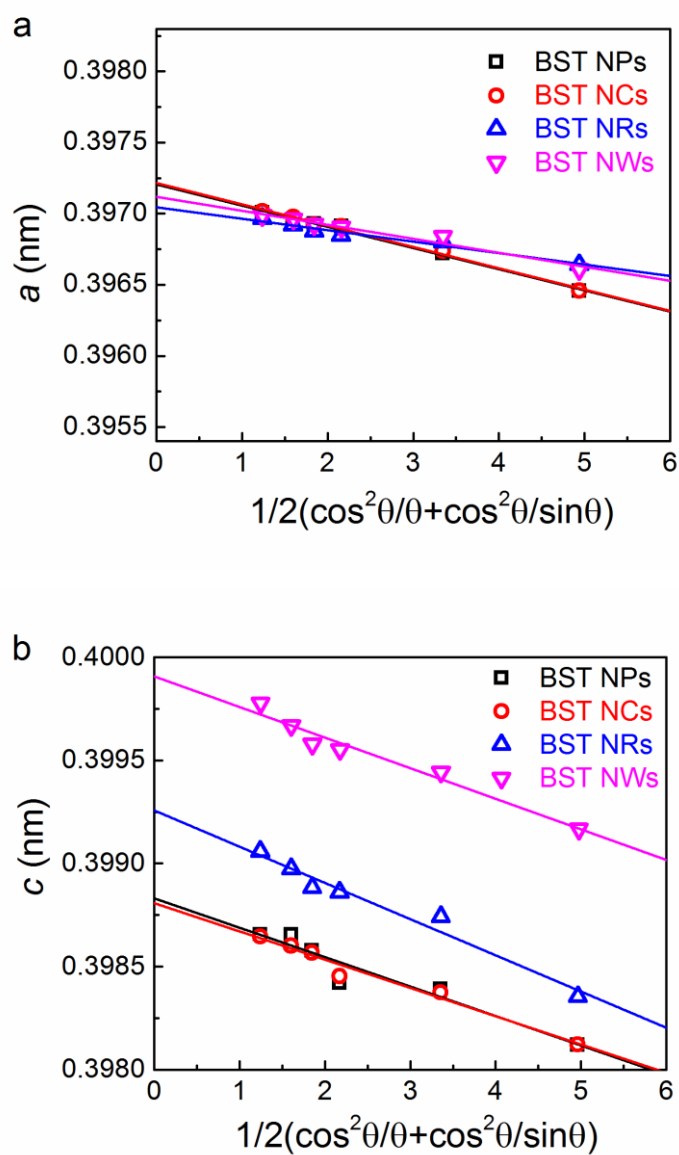

**Figure S3.** The calculated lattice parameters of the BST powders as a function of  $1/2(\cos^2\theta/\theta + \cos^2\theta/\sin\theta)$ .

**Table S2.** Lattice parameters of the BST NPs, NCs, NRs and NWs extrapolated from Figure S3.

| BST | $a$ [100] (Å) | $c$ [001] (Å) | $c/a$ | Lattice volume (Å <sup>3</sup> ) |
|-----|---------------|---------------|-------|----------------------------------|
| NPs | 3.972         | 3.988         | 1.004 | 62.918                           |
| NCs | 3.972         | 3.988         | 1.004 | 62.918                           |
| NRs | 3.971         | 3.993         | 1.006 | 62.965                           |
| NWs | 3.971         | 3.999         | 1.007 | 63.060                           |

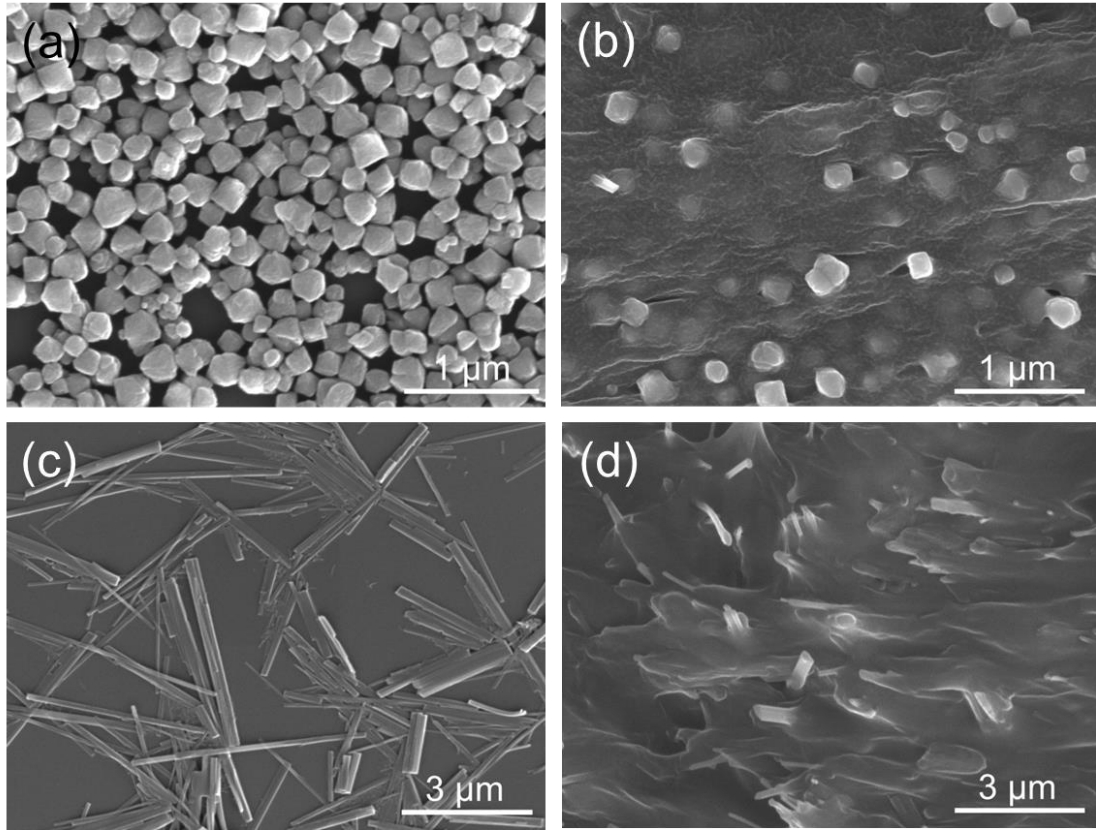

**Figure S4.** SEM images of the (a) BST NCs and (c) BST NRs. (b) Cross-section SEM image of the P(VDF-TrFE-CFE)/10 vol% BST NCs nanocomposite. (d) Cross-section SEM image of the P(VDF-TrFE-CFE)/10 vol% BST NRs nanocomposite.

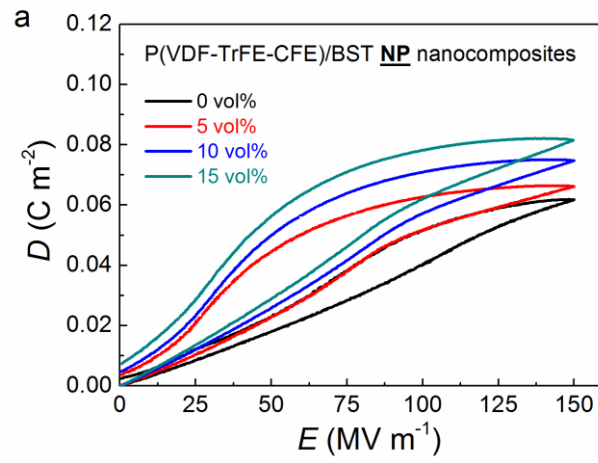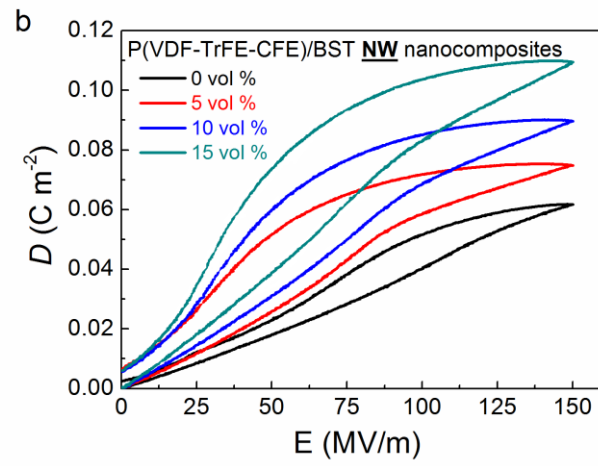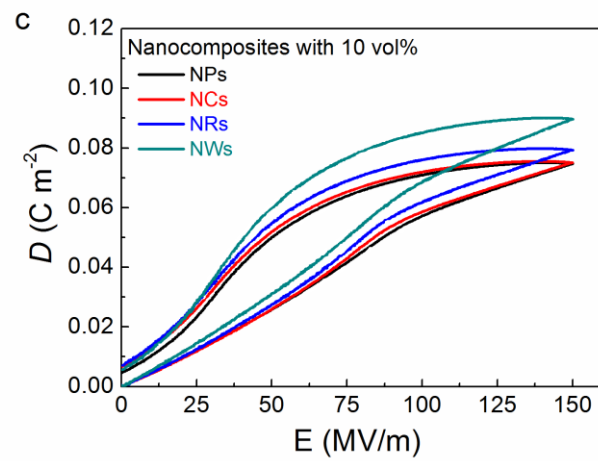



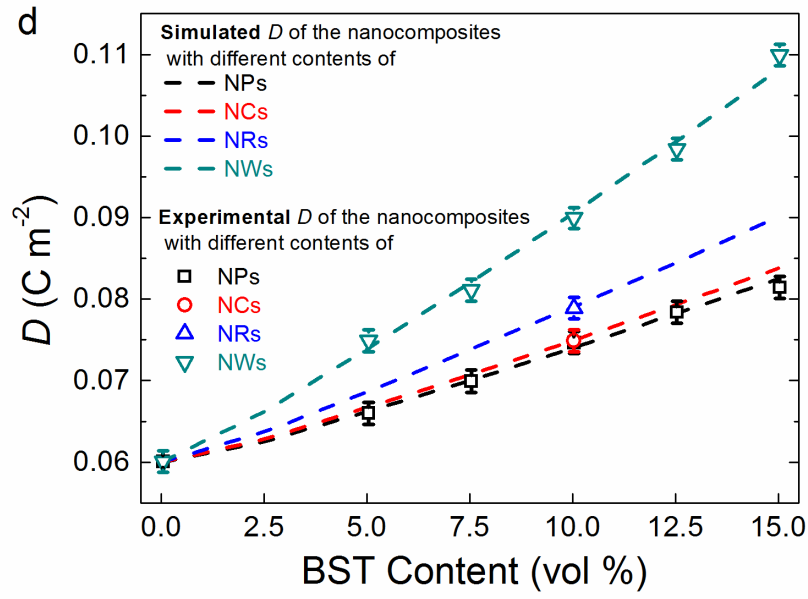

**Figure S5.** Electric displacement ( $D$ )-electric field ( $E$ ) loops of the nanocomposites containing different contents of (a) BST NPs and (b) BST NWs. (c)  $D$ - $E$  loops of the nanocomposites with 10 vol% BST NPs, NCs, NRs and NWs. (d) The experimental and phase-field simulated electric displacements of the nanocomposites with different kinds and contents of BST nanofillers. Error bars: Standard error.

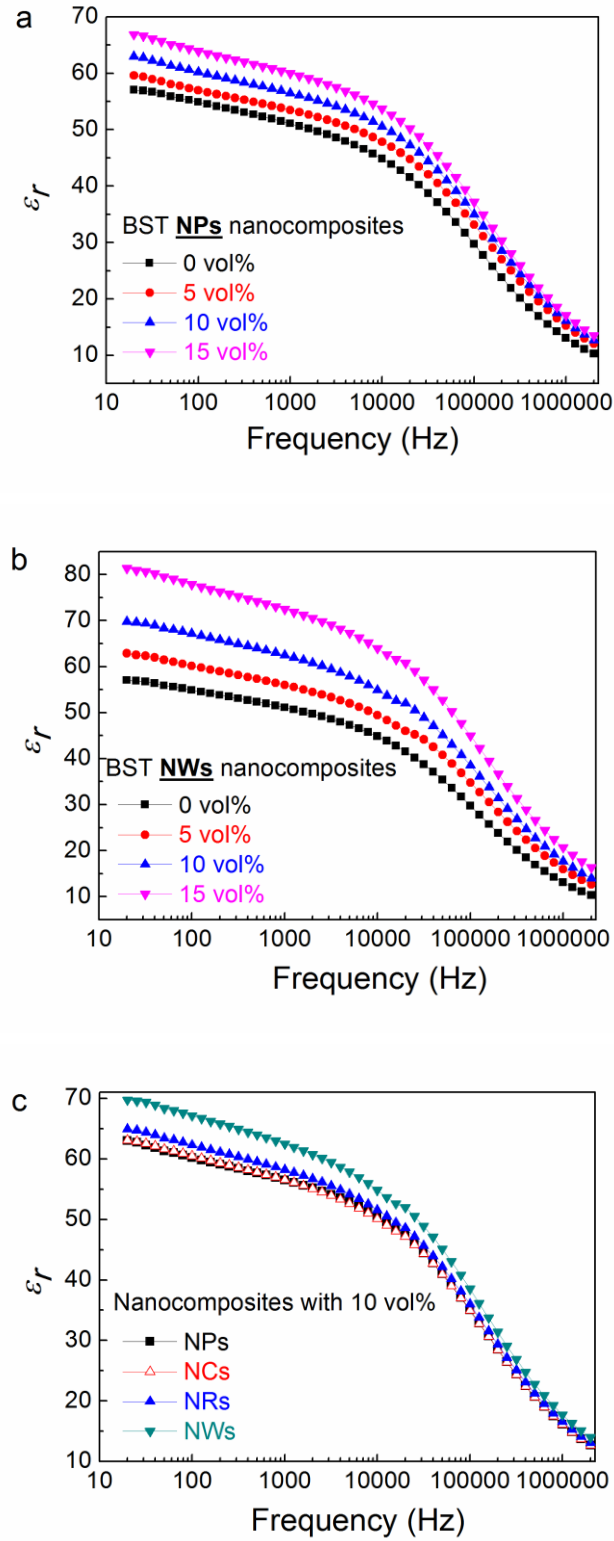

**Figure S6.** Relative dielectric constant ( $\epsilon_r$ ) of the nanocomposites with different contents of (a) BST NPs and (b) BST NWs as a function of frequency. (c) Relative dielectric constant-frequency curves of the nanocomposites with 10 vol% BST NPs, NCs, NRs and NWs.

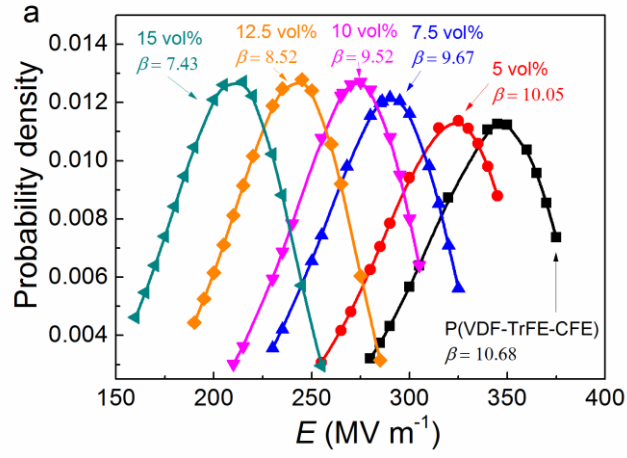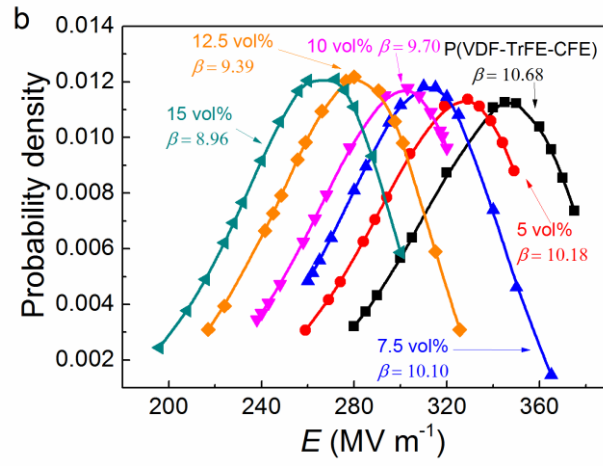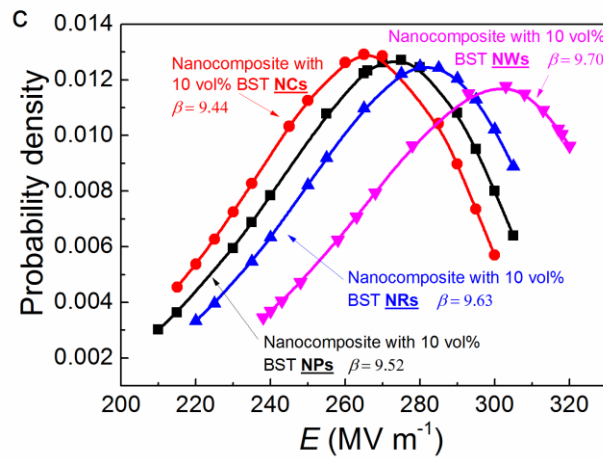

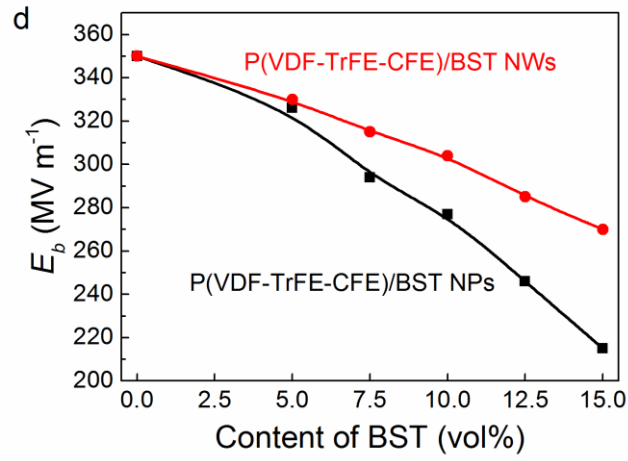

**Figure S7.** Weibull plots of the (a) P(VDF-TrFE-CFE)/BST NPs and (b) P(VDF-TrFE-CFE)/BST NWs nanocomposites. (c) Weibull plots of the nanocomposites with 10 vol% BST NPs, NCs, NRs and NWs. (d) Weibull breakdown strength ( $E_b$ ) of the P(VDF-TrFE-CFE)/BST nanocomposites as a function of BST content.

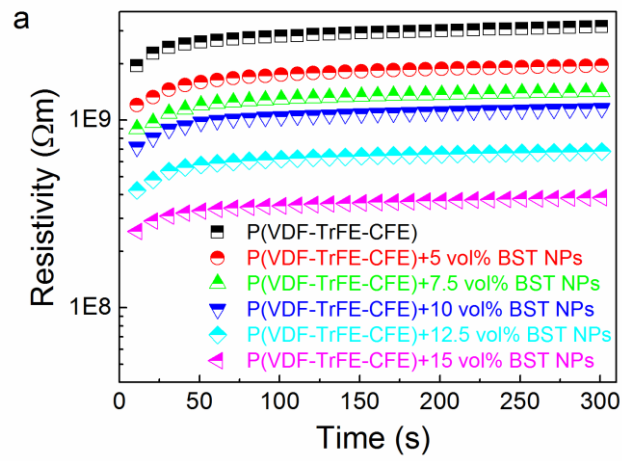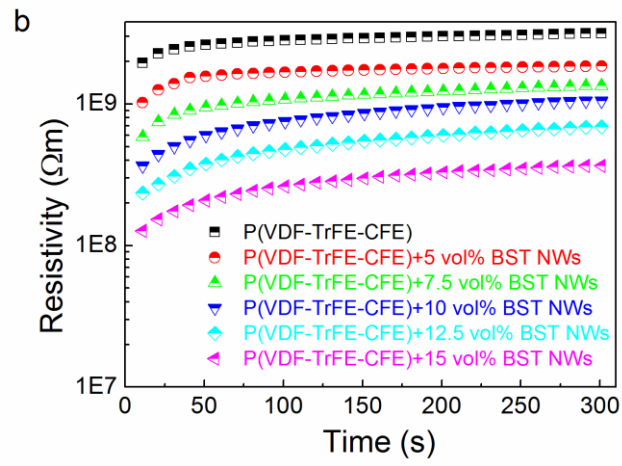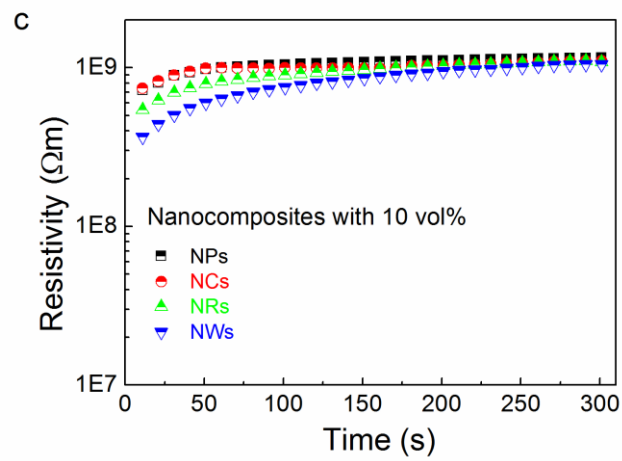

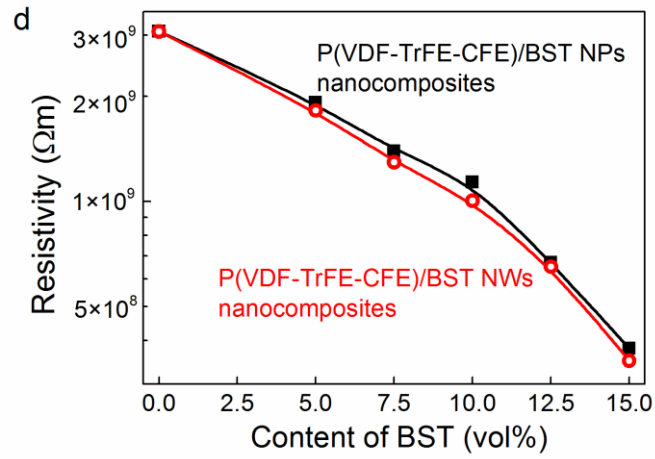

**Figure S8.** Time dependence of electrical resistivity of the (a) P(VDF-TrFE-CFE)/BST NPs and (b) P(VDF-TrFE-CFE)/BST NWs nanocomposites. (c) Time dependence of electrical resistivity of the nanocomposites with 10 vol% BST NPs, NCs, NRs and NWs. (d) Electrical resistivity of the P(VDF-TrFE-CFE)/BST nanocomposites as a function of filler content.

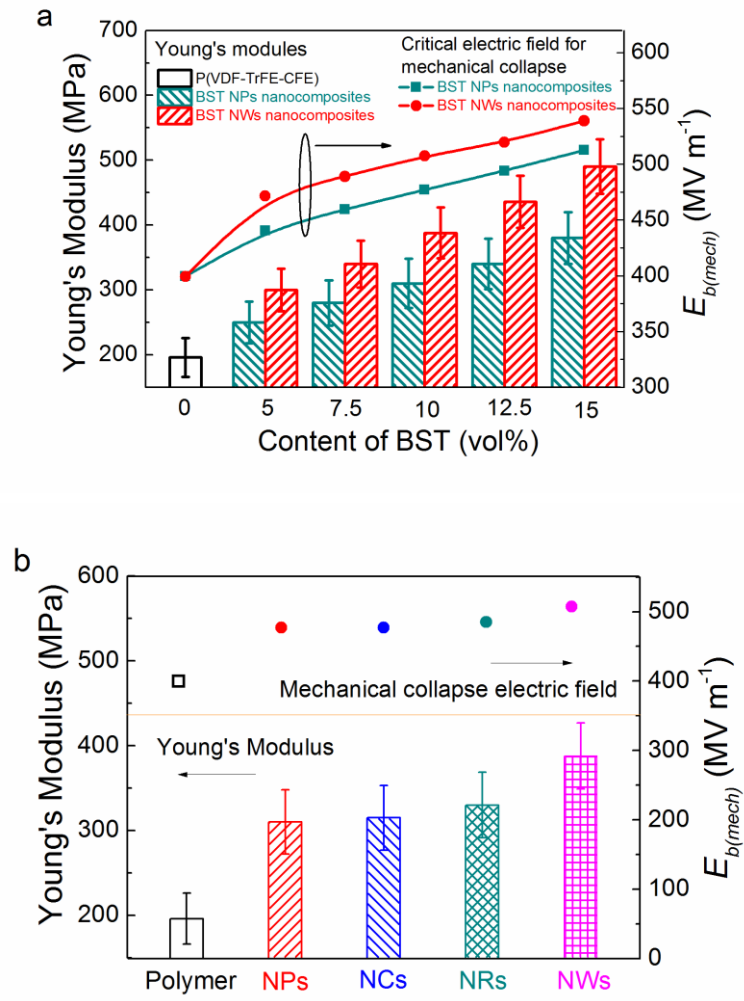

**Figure S9.** Young's modulus and critical mechanical collapse electric fields calculated according to Equation 5 of the nanocomposites. (a) The nanocomposites containing different contents of BST NPs and NWs. (b) The P(VDF-TrFE-CFE) and its nanocomposites with 10 vol% BST NPs, NCs, NRs and NWs. Error bars: Standard error.

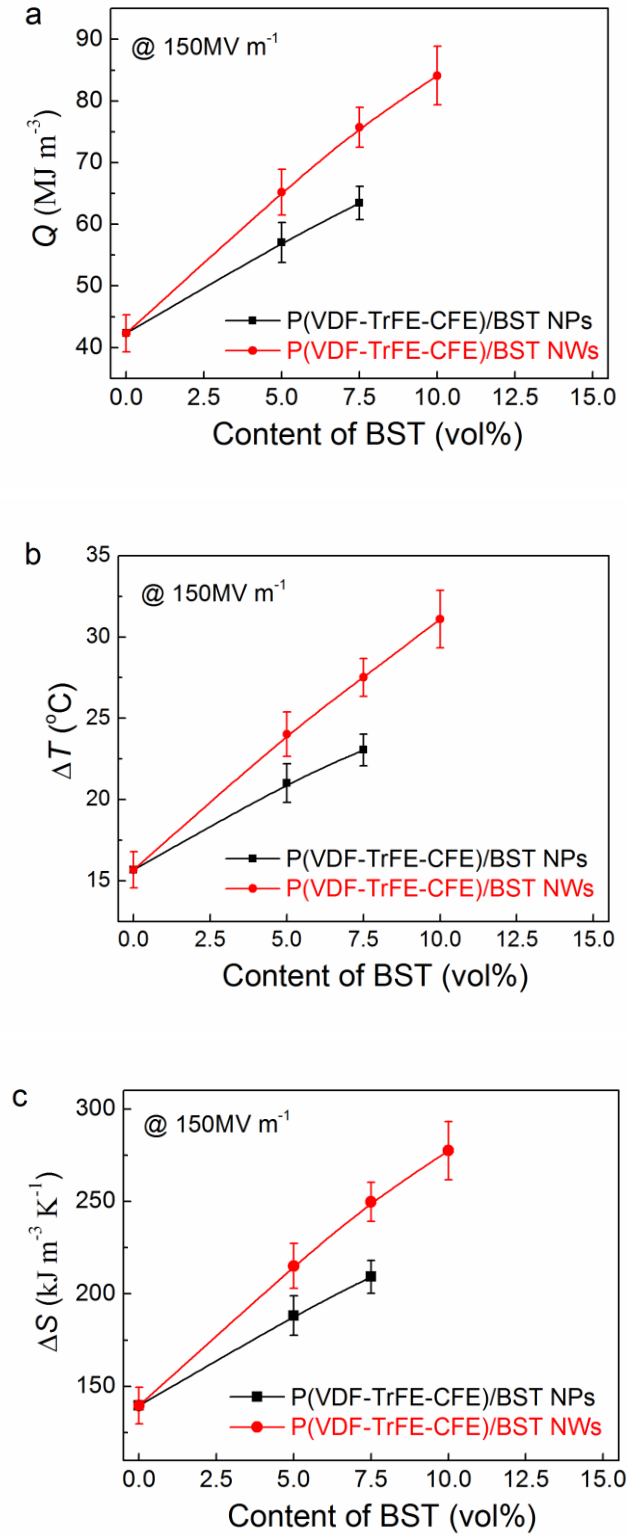

**Figure S10.** (a)  $Q$ , (b)  $\Delta T$  and (c)  $\Delta S$  of the P(VDF-TrFE-CFE) and nanocomposites with different contents of BST NPs and NWs at 150 MV m<sup>-1</sup>. Error bars: Standard error.



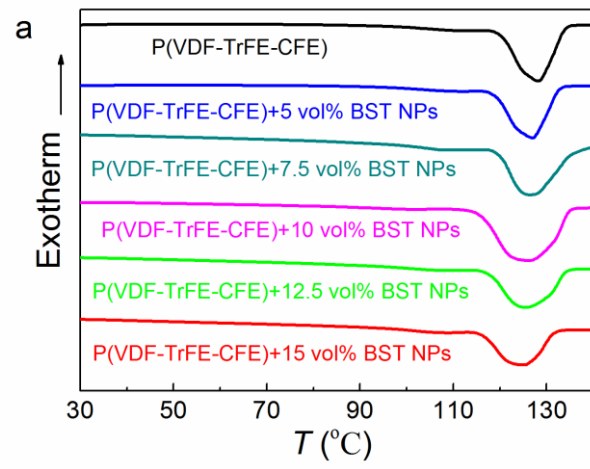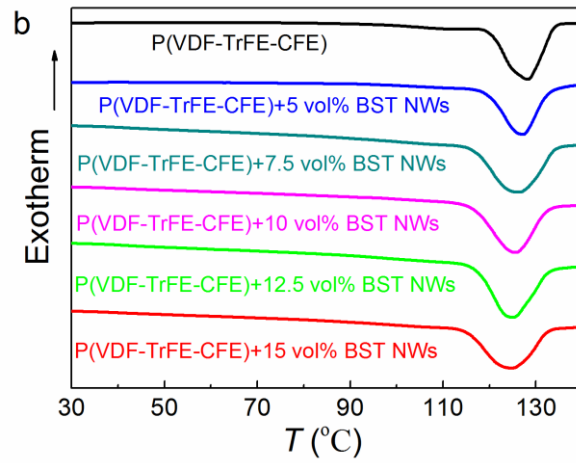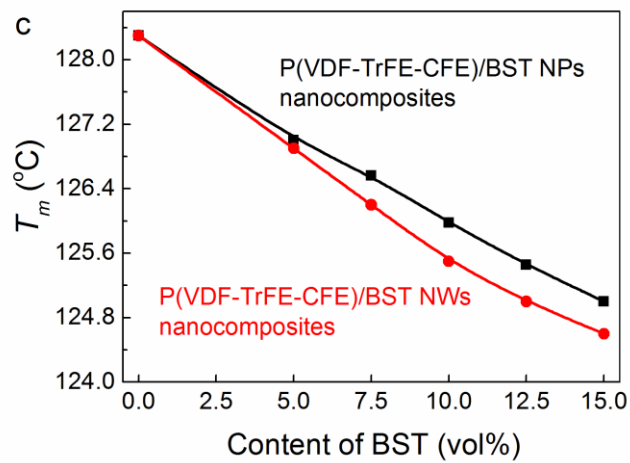

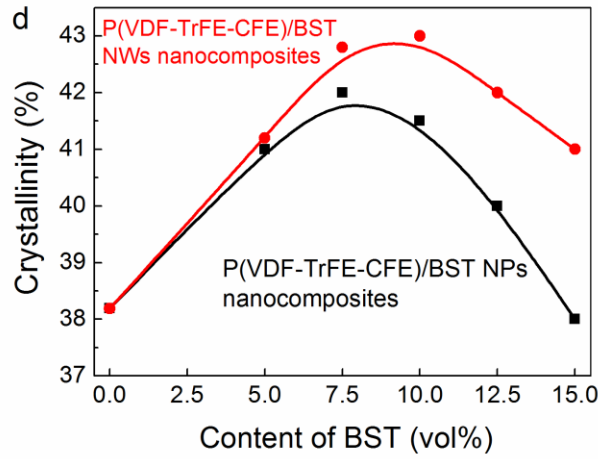

**Figure S11.** DSC profiles of the (a) P(VDF-TrFE-CFE)/BST NPs and (b) P(VDF-TrFE-CFE)/BST NWs nanocomposites. (c) The melting temperatures ( $T_m$ ) and (d) degree of crystallinity derived from the DSC profiles.  $T_m$  of the nanocomposites decreases as the content of BST increases, indicating that the presence of the nanoparticles in the polymer matrix decreases the crystal size of the terpolymer. This has been further confirmed by the XRD studies shown in Figure S12. In addition, the crystallinity increases as the content of BST increases up to 7.5 vol% for the P(VDF-TrFE-CFE)/BST NPs nanocomposites and 10 vol% for the P(VDF-TrFE-CFE)/BST NWs nanocomposites. The crystallinity was calculated from  $\Delta H_{f,PVDF}^0 = 104.7$  J/g corresponding to the heat of formation of PVDF with theoretical 100% crystalline. It should be noted that the  $T_m$  of the P(VDF-TrFE-CFE)/BST NWs nanocomposites is lower, whereas the degree of crystallinity is higher than those of P(VDF-TrFE-CFE)/BST NPs nanocomposites when the same content of BST is added.

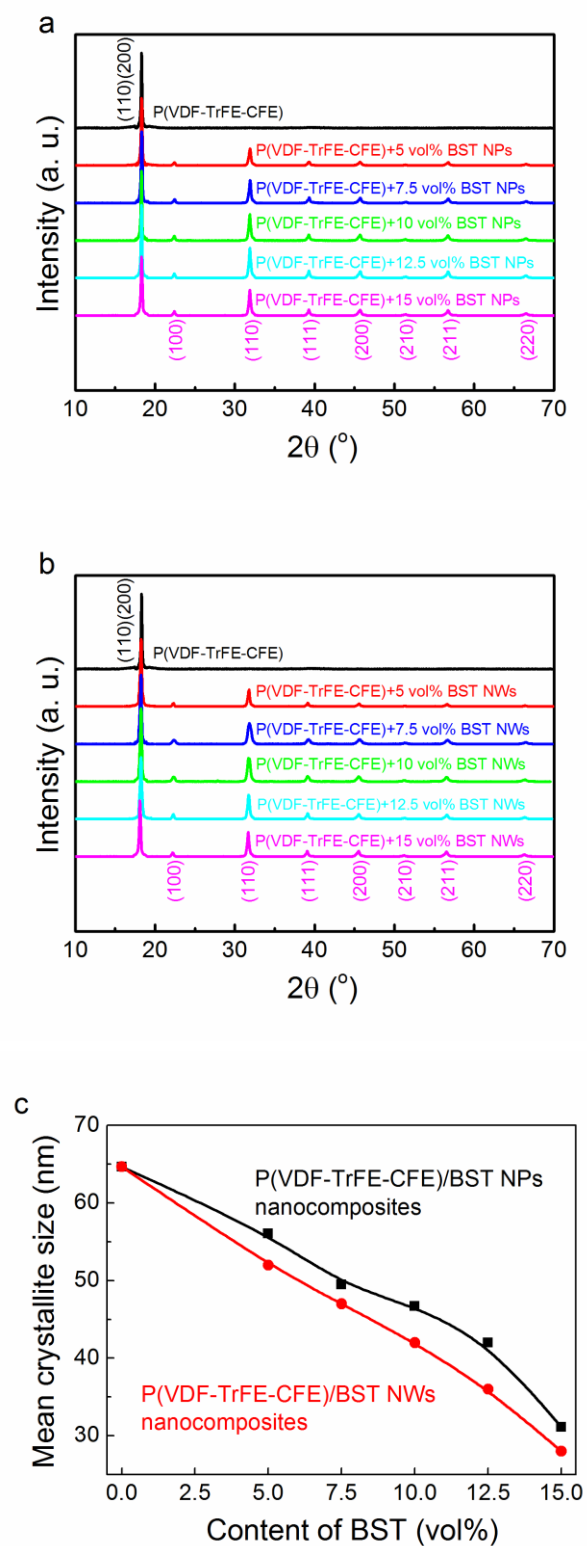

**Figure S12.** XRD patterns of the (a) P(VDF-TrFE-CFE)/BST NPs and (b) P(VDF-TrFE-CFE)/BST NWs nanocomposites. (c) Calculation of mean crystallite sizes for (110)/(200) face of P(VDF-TrFE-CFE) and P(VDF-TrFE-CFE)/BST polymer nanocomposites. The mean crystallite sizes of the nanocomposites decreases

as the content of BST increases, especially for the nanocomposites with BST NWs.

The calculation of mean crystallite size is based on the Scherrer equation  $\tau = (r \lambda) / \beta \cos \theta$ , where  $\tau$  is the mean size of the crystalline domains,  $r$  is a dimensionless shape factor,  $\lambda$  is the X-ray wavelength,  $\beta$  is the line broadening at half the maximum intensity (FWHM), and  $\theta$  is the Bragg angle.

## References

1. Takeuchi, T.; Tabuchi, M.; Kageyama, H. Preparation of Dense BaTiO<sub>3</sub> Ceramics with Submicrometer Grains by Spark Plasma Sintering. *J. Am. Ceram. Soc.* **1999**, *82*, 939-943.
2. Nelson, J. B.; Riley, D. P. An Experimental Investigation of Extrapolation Methods in the Derivation of Accurate Unit-Cell Dimensions of Crystals, *Proc. Phys. Soc.* **1945**, *57*, 160-176.
